# Supplementary material for: UV crosslinked mRNA-binding proteins captured from leaf mesophyll protoplasts
Source: PubMed Central journal article supplement (PMC5093948; doi:10.1186/s13007-016-0142-6), 2016-11-03

**a**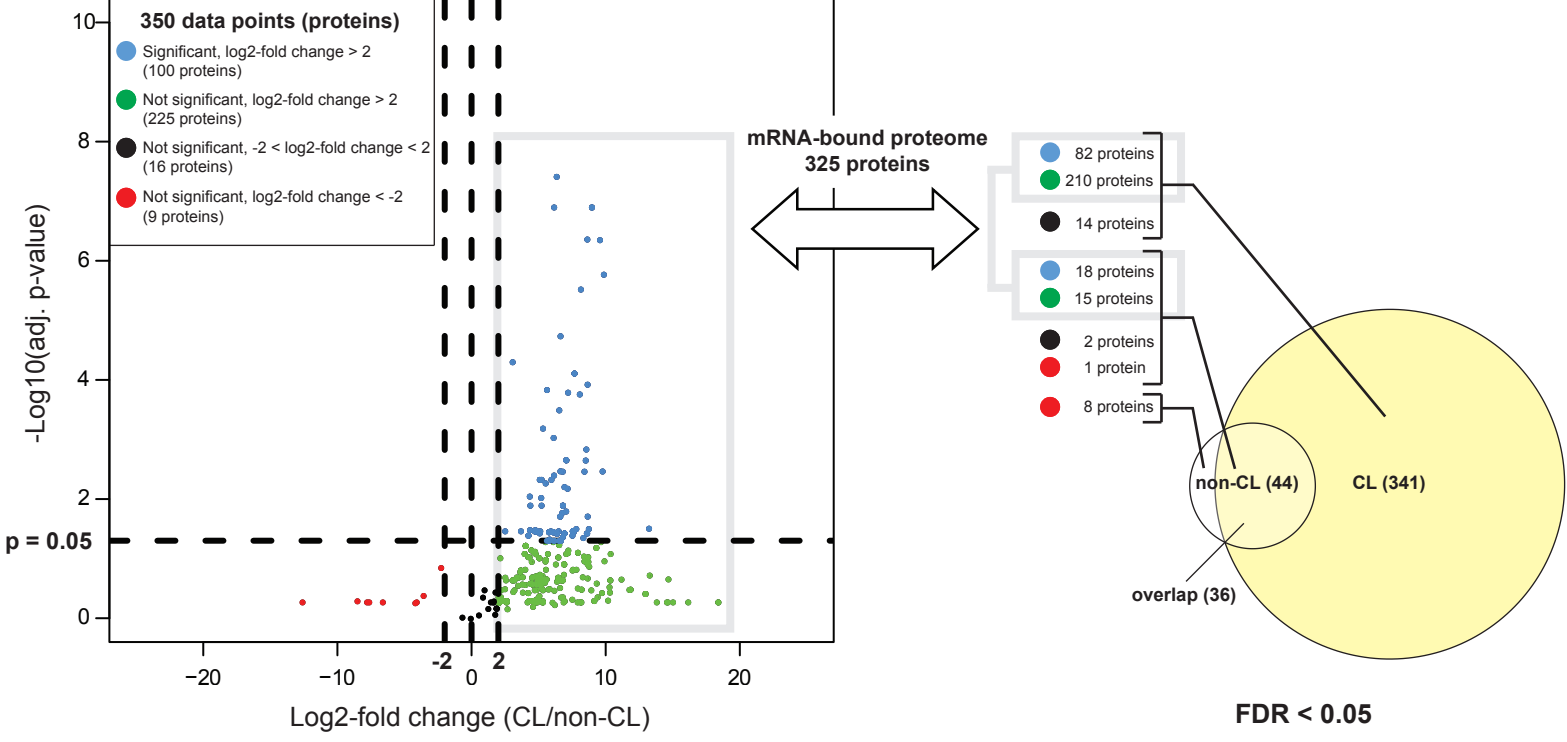**b**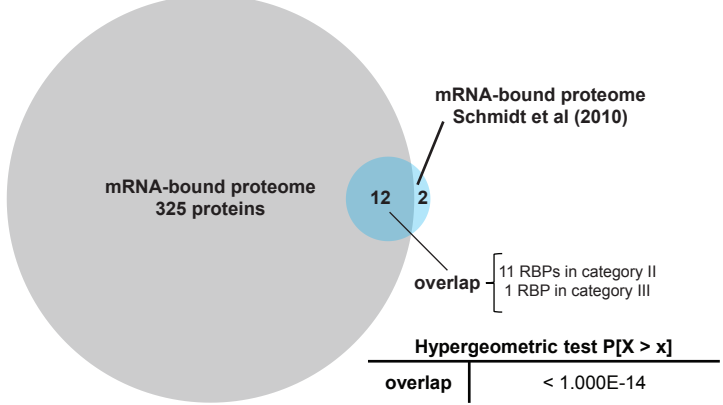

Supplement: 13007_2016_142_MOESM1_ESM.pdf [file 13007_2016_142_MOESM1_ESM.pdf]
